# Supplementary material
Source: PubMed Central journal article supplement (PMC5378505)

Appendix 2 (as supplied by the authors): Program overview

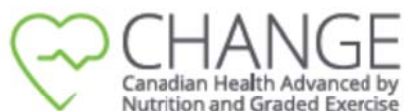

# Program Overview

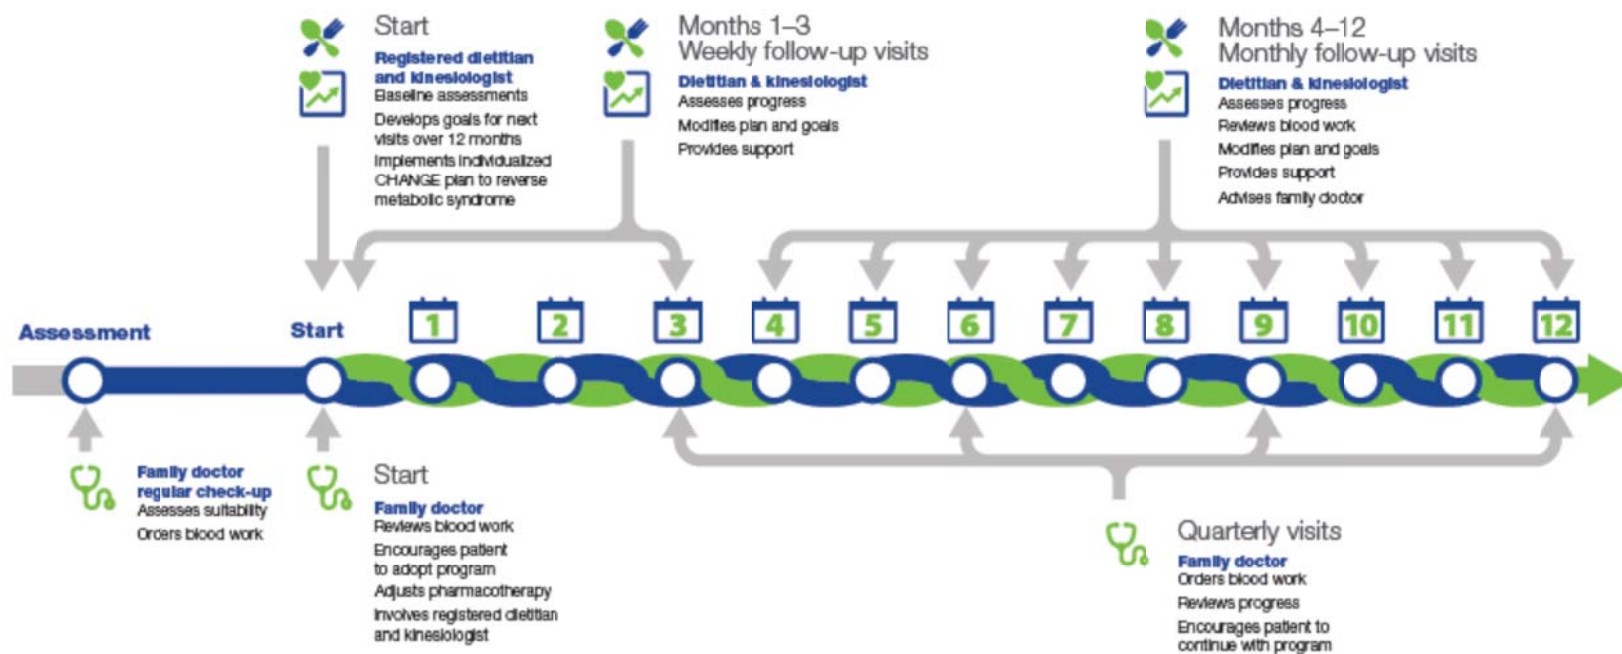

Supplement: supp_5.1.E229_2016-0101-2-at.pdf [file supp_5.1.E229_2016-0101-2-at.pdf]
